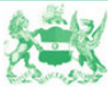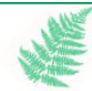

# Comparative pappus micromorphology of edelweiss (*Leontopodium*, Gnaphalieae, Asteraceae) with implications for taxonomy, ecology and evolution

J. SEBASTIAN STILLE<sup>1\*</sup>, TOD F. STUESSY<sup>2,3</sup>, W. BERNHARD DICKORÉ<sup>4</sup>, MICHAEL JAEGER<sup>5</sup>, BIRGIT GEMEINHOLZER<sup>1</sup> and VOLKER WISSEMANN<sup>1,5</sup>

<sup>1</sup>Institut für Botanik, Justus-Liebig-Universität Giessen, AG Spezielle Botanik, Heinrich-Buff-Ring 38, 35392 Giessen, Germany

<sup>2</sup>Herbarium and Department of Evolution, Ecology, and Organismal Biology, The Ohio State University, 1315 Kinnear Road, Columbus, OH, USA

<sup>3</sup>Department of Botany and Biodiversity Research, University of Vienna, Rennweg 14, A-1030 Vienna, Austria

<sup>4</sup>Botanische Staatssammlung München, Menzinger Str. 67, 80638 München, Germany

<sup>5</sup>Justus-Liebig-Universität Giessen, Botanischer Garten, Senckenbergstr. 6, 35390 Giessen, Germany

Received 14 January 2016; revised 24 May 2016; accepted for publication 14 July 2016

We analysed pappus characters in 31 of the *c.* 34 accepted *Leontopodium* spp. (edelweiss). Micromorphological pappus character states were useful for discriminating between individual species and intrageneric groups. The pappus differs in number, length, breadth, surface structure, colour and the tips of the bristles. Several features characterize single species, for example a unique fan-like tip that is only found in *L. franchetii*. *Leontopodium* section *Nobilia* is supported by unusual pappus characters. Experimental evidence shows that the pappus of *Leontopodium*, previously thought to be caducous, is well suited for wind dispersal of the fruit. One clear trend is that species growing in sparsely vegetated, high-altitude regions often have more numerous and longer pappus bristles, particularly on the female flowers. © 2016 The Linnean Society of London, *Botanical Journal of the Linnean Society*, 2016, 182, 612–636

ADDITIONAL KEYWORDS: adaptation – Compositae – Cypselae – microscopy – wind dispersal.

## INTRODUCTION

*Leontopodium* R.Br. ex Cass. (Gnaphalieae, Asteraceae), known as edelweiss, comprises *c.* 34 species (Blöch *et al.*, 2010; Safer *et al.*, 2011; Russell *et al.*, 2013; Stille *et al.*, 2014; W. B. Dickoré, unpubl. data). More species, however, were recognized in earlier surveys. In the only scientific monograph to date, by Handel-Mazzetti (1927), 41 species were treated, whereas *Flora of China* lists 58 species (Wu, Raven & Hong, 1994). Altogether, the number of species validly described in the genus has been *c.* 120, but most of these are synonyms. In particular, limited knowledge of patterns of growth and variation in

natural populations has led to over-estimation of species diversity.

*Leontopodium* occupies many different habitats in the Asian mountains, being spread in a largely continuous distribution in central, temperate south-eastern and eastern Asia (Blöch *et al.*, 2010). About 15 species occur in the centre of diversity in the Sino-Himalayan region (Hengduan–Shan mountain region in south-western China; Meusel & Jaeger, 1992; Safer *et al.*, 2011). Two species grow much further west, as disjuncts in the European mountains (Meusel & Jaeger, 1992; Safer *et al.*, 2011): *Leontopodium alpinum* Cass. (Pyrenees, Alps, Carpathians, Balkan Peninsula) and *L. nivale* Ten. Huet ex Hand.-Mazz. (Apennines in Italy, Pirin Mountains in Bulgaria).

Within the *Leontopodium* pseudanthium, female (pistillate, male-sterile) and male (staminate,

\*Corresponding author. E-mail: sebastianstille@googlemail.com

female-sterile) flowers occur in various compositions and arrangements. Most plants are monoecious with heterogamous inflorescences, but sometimes homogamous inflorescences and occasional dioecious plants occur. Beauverd initially believed that these sexual variations might be of taxonomic significance, but he later realized that this was not the case (Beauverd, 1909, 1910, 1911, 1912, 1914). Male and female flowers possess a pappus formed of bristles, which are connate in a ring at the base. Usually they are white

and have barbs formed by single cells of the outer layer (Figs 1, 2).

The functions of the pappus of *Leontopodium* seem to be various. The pappus of Asteraceae is assumed to play a role in the wind-dispersal of the seeds (Azuma, 2006). In garden culture of *Leontopodium*, one commonly observes dry seeds being dispersed by wind from plants, hence revealing the efficiency of dispersal. In a small experiment that is part of this study (see Material and Methods), we tested this

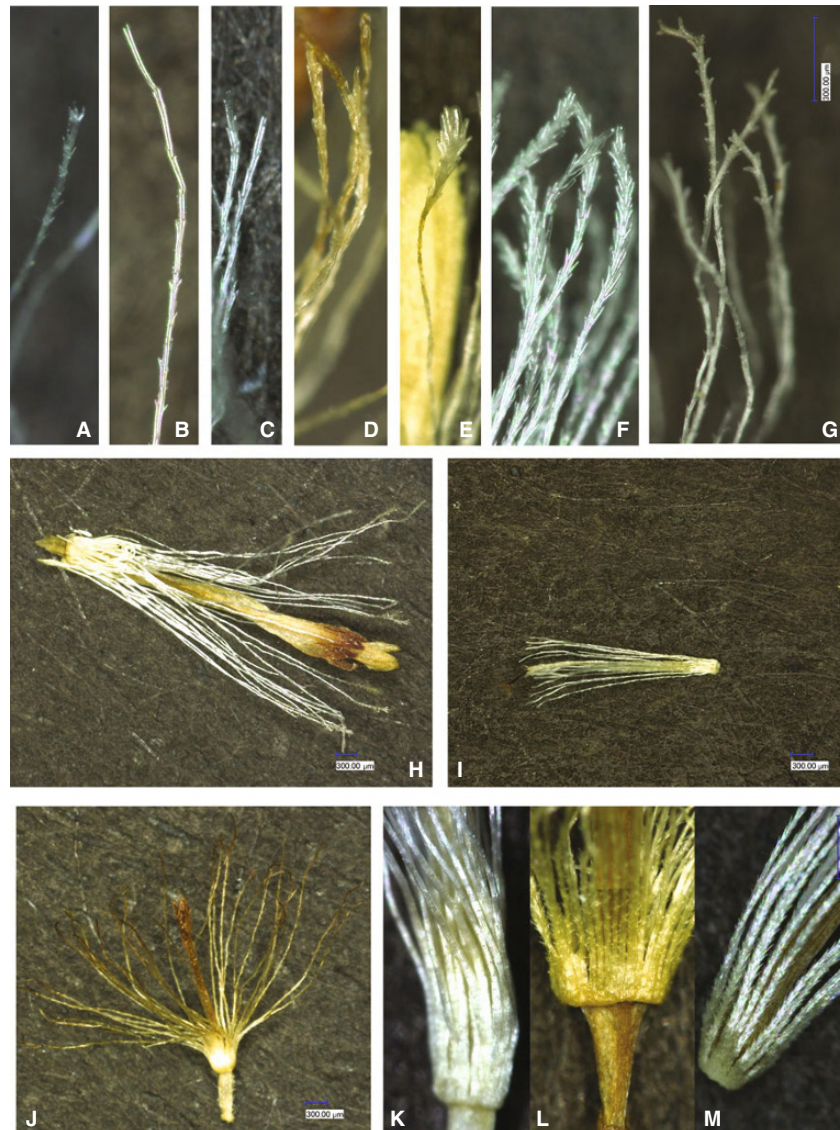

**Figure 1.** A, no structure at the end: *L. microphyllum* m. B, elongated 'end cells': *L. nanum* w. C, accumulation of elongated cells: *L. discolor* w. D, tip of round cells: *L. muscoides* m. E, fan tip: *L. franchetii* m. F, tree-like tip: *L. souliei* m. G, button-like barbs *L. roseum* m; two scale bars valid for A–G. H, bristle length: large *L. nanum* m. I, bristle length: small *L. artemisiifolium* w. J, coloured bristle *L. aurantiacum* w. K, number of barbs: nearly no barbs on the bristle *L. lingianum* w. L, number of barbs: some barbs on the bristle *L. jacotianum* m. M, number of barbs: many barbs on the bristle *L. discolor* w; scale bar valid for K–M. m, male; f, female.

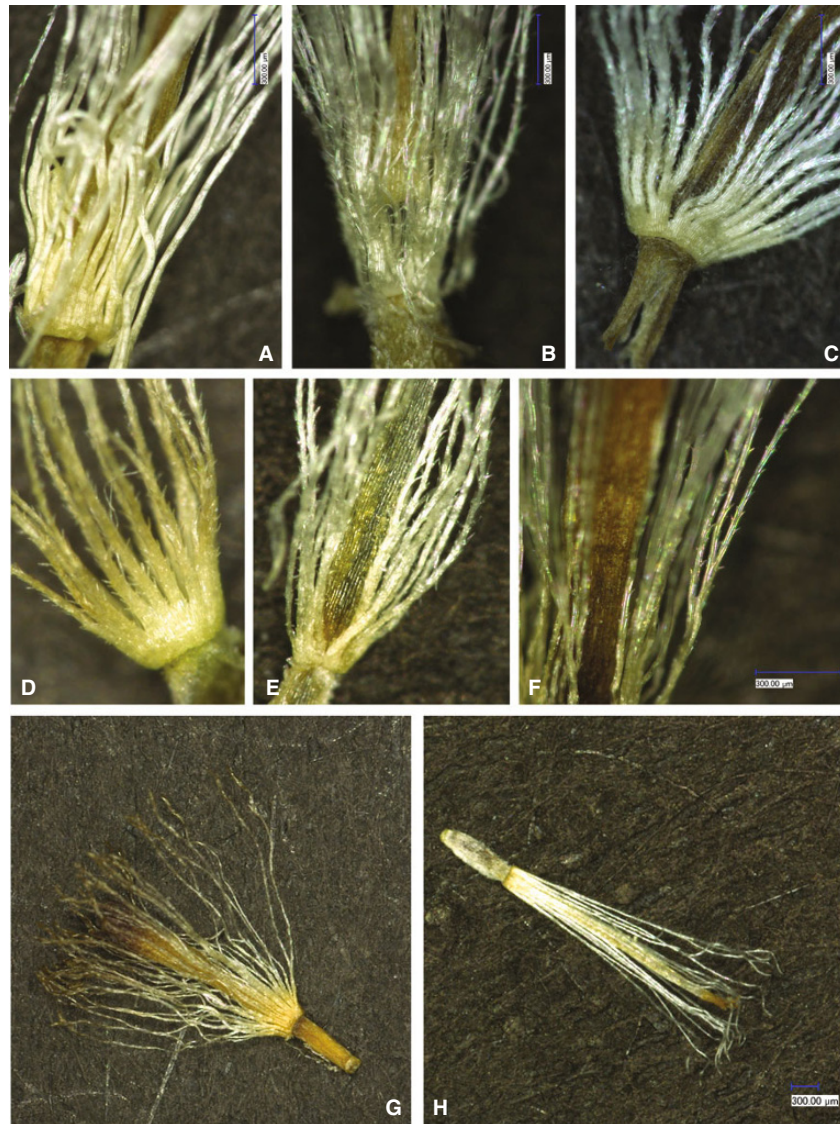

**Figure 2.** A, miniature barbs *L. nanum* m. B, long thin barbs *L. monocephalum* w. C, massive barbs *L. discolor* m. D, thickness: big *L. wilsonii* w. E, thickness: medium *L. franchetii* w. F, thickness: thin *L. oroleucum* m; scale bar valid for D–F. G, number of pappus bristles, for example 42 *L. giraldii* m and 15 *L. sinense* w; scale bar valid for G and H. m, male; f, female.

assumption more precisely. Handel-Mazzetti (1927), however, pointed out that the pappus is also caducous in herbarium material, in which case it would be useless for dispersal, but this apparently occurs only after complete drying of the fruits. The pappus also plays an important role in aiding release of fruits from the maturing head, by spreading outward with hygroscopic movements and lifting the cypselae upward (Van der Pijl, 1982) (Fig. 3). Furthermore, the pappus of *Leontopodium* potentially also has a defensive function, offering apical protection against predation on the fruits or ovaries (Stuessy & Garver, 1996). The pappus bristles might also help retain

moisture around the cypselae by cohesive attraction to avoid premature desiccation, as Stuessy & Spooner (1988) suggested for one of the roles of receptacular bracts in some members of the family (e.g. *Heliantheae s.l.*).

Although edelweiss is a well-known plant and important part of the cultural heritage of the international alpine region, little research on the genus has been conducted. In the second part of the 20<sup>th</sup> century, some studies investigated the biology, ecology and chorology of *L. alpinum* (Sokolowska-Kulczycka, 1959; Maugini, 1962; Tira, Galeffi & Dimodica, 1970; Erhardt, 1993; Hook, 1994). At the

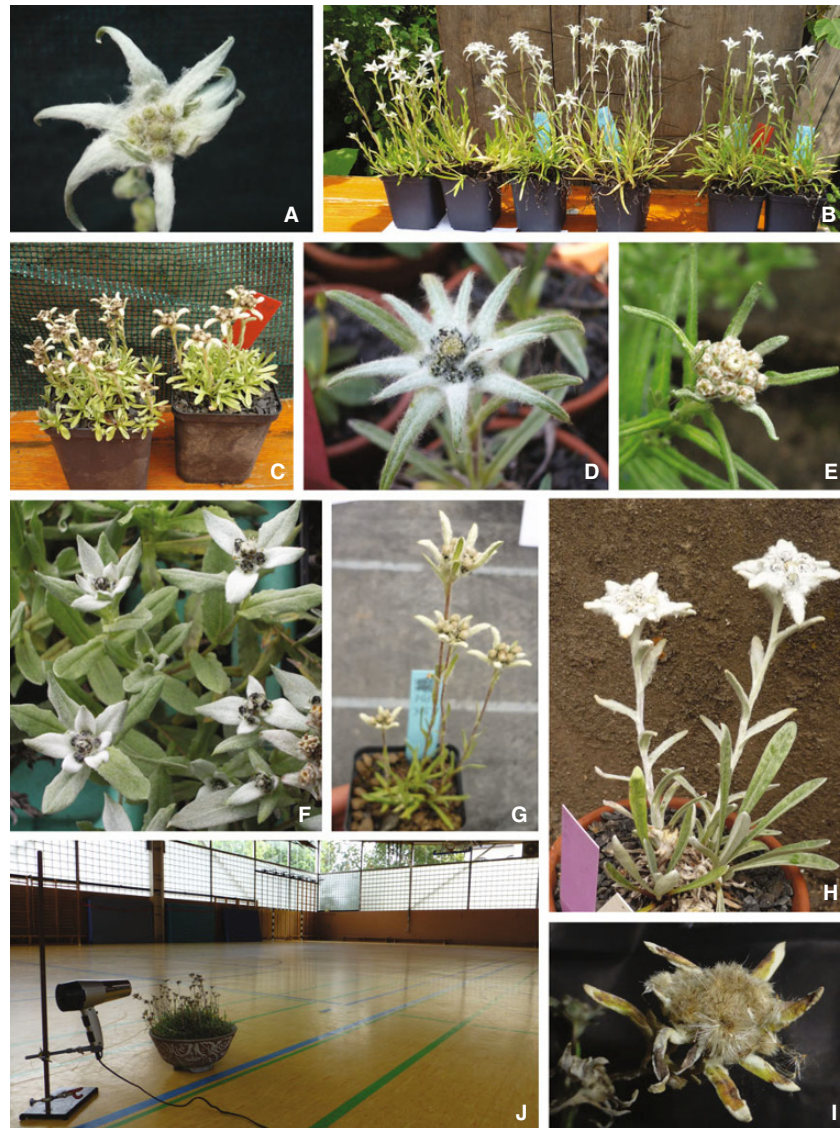

**Figure 3.** The leontopodium collection of the botanical garden Gießen: A, *L. himalayanum*. B, *L. discolor*. C, *L. pusillum*. D, *L. calocephalum*. E, *L. haplophylloides*. F, *L. dedekensii*. G, *L. leontopodium*. H, *L. nivale*. I, mature seeds of *L. sp.* leave the heads by hydroscopic movement of the pappus. J, anemochorie experiment with *L. sp.* in a sports hall.

beginning of the 21<sup>st</sup> century, several unknown secondary metabolites were found in several species (Stuppner *et al.*, 2002; Dobner *et al.*, 2003a, b, 2004; Schwaiger *et al.*, 2004, 2005; Speroni *et al.*, 2006; Hornick *et al.*, 2008; Reisinger *et al.*, 2009). Because some of these compounds now show biological activity (Safer *et al.*, 2011), interest in other species and the whole genus has increased. To understand better the phylogenetics and taxonomy of the genus, Blösch *et al.* (2010) and Safer *et al.* (2011) conducted molecular phylogenetic studies and Russell *et al.* (2013) and Stille *et al.* (2014) investigated karyotaxonomy. A modern comprehensive systematic treatment would be desirable, however, as little is known about

Asian *Leontopodium* spp. A more predictive classification would also provide a better basis for further pharmaceutical research (Safer *et al.*, 2011).

Previous studies have specifically dealt with the pappus of *Leontopodium*. The structure of the pappus bristles has been examined as part of descriptions of many new taxa, for example by Handel-Mazzetti (1927), who used complex Latin adjectives, such as *clavato-incrassatae*, *paulum incrassatae*, *modice incrassatae*, *vix incrassatae*, *paulum clavato-inflatae*, *apice cellulis inflatis*, *sensim incrassatae*, *subclavato-incrassatae* and *anguste clavato-incrassatae* (Handel-Mazzetti, 1927). Handel-Mazzetti also compared pappus bristles with the aim of finding diagnostic

species characters (his prepared material is preserved in the Natural History Museum, Vienna). He concluded that special structures seem to be characteristic of several species: 'Für einige Arten erweist sich, soweit Material vorliegt, eine bestimmte Form als konstant' [In some species, to the extent that material exists, it proves that a certain form is constant] (Handel-Mazzetti, 1927). However, his observations were limited and he did not deal with all known species at that time.

Systematic comparative micromorphological studies on the pappus of *Leontopodium* are therefore the focus for the present investigation. Thirty-one of the 34 presently recognized species have been analysed micromorphologically. The results show that micromorphological data from the pappus are helpful for detecting new taxonomic characters, forming helpful categories, drawing systematic conclusions and inferring relationships among species, particularly in the context of recent phytochemical, molecular and karyological studies.

## MATERIAL AND METHODS

### PLANT MATERIAL

All investigated pappus specimens were taken from herbarium material from GI, GOET, W and WU. Thirty-one of the 34 *Leontopodium* spp. were investigated; only *L. fangingense* Ling, *L. kurilense* Takeda and *L. sp. nov.* (W. B. Dickoré unpubl. data), for which herbarium material was not available, were lacking. All examinations were carried out on fully developed dry fruits. Preliminary analyses of selected species had shown that pappus bristle structure did not differ in the investigated characters according to the position of the flower within the head. Male and female flowers (of most species) from three well-determined specimens from different geographical regions were used. The few exceptions were due to poor availability of material in some species. For specific character states (e.g. unique tip structure of *L. franchetii* Beauverd), more population samples were analysed. Taxa studied and detailed voucher information are listed in Table 1.

### MICROMORPHOLOGICAL OBSERVATIONS

Pappus structures were investigated using a three-dimensional (3D) light microscope (Keyence VHX-20000; Deutschland GmbH) and 3D digital pictures were made. At least three pictures were taken from each chosen pappus: one of the whole pappus (analysis of bristle quantity, length and colour); one of the tip (analysis of the structure of the tip); and one of

the lower part of the bristle (analysis of the breadth and surface of the bristle) (Figs 1, 2).

All specimens of all species and of each sex were included to identify character states that were judged to be typical. In preliminary morphological investigations, we identified categories of character states that appeared to encompass the observed patterns of variation. Seven characters of the pappus were investigated (bristle length, colour, surface structure, type of barbs on the surface, tip structure and number of bristles). For each character, different character states were defined and investigated for each sex and each species. Some categories, such as miniature barbs, long thin barbs or massive barbs on the pappus bristles may well be functional, whereas others may not contribute directly to fitness (e.g. the angle between the bristle and a single barb). Patterns of morphological distinct character correlations were calculated and visualized using a principal coordinate analysis (PCoA) using GenAlEx version 6.5 (Peakall & Smouse, 2012).

### ANEMOCHORY EXPERIMENT

To test the efficacy of the *Leontopodium* pappus for wind dispersal, a small experiment was conducted. Several *Leontopodium* plants (*Leontopodium* sp. taken from the botanical garden of the Justus Liebig University Giessen) growing in flower pots were observed for months until the seeds became mature and the weather conditions were suitable for dispersal. We observed that the seeds left the fruiting heads by hygroscopic movement of the pappus. A hair-dryer was also used to blow wind on the heads from a safe distance and observations were made on fruit dispersal.

## RESULTS

After observing the variety of pappus structure in *Leontopodium*, a system of different categories for the description and differentiation of typical character states was developed for each species. Other recent studies on the pappus in other groups of Asteraceae have suggested this as a useful way to deal with morphological variation and for acquisition of authoritative data (Semple & Hood, 2003). The different characters and states are presented in Table 2, organized by species and sexual conditions of the heads.

### CHARACTERS AND CHARACTER STATES

#### *Bristle tip*

In many cases, the bristle tip of the pappus provides a diagnostic character for each species or subgroup

Table 1. Taxa and voucher information

| Taxon                                                 | Sex | Collector no.                         | Herbarium | Herbarium no. | Country (state) | Locality                                                             | Altitude (m) | Date       |
|-------------------------------------------------------|-----|---------------------------------------|-----------|---------------|-----------------|----------------------------------------------------------------------|--------------|------------|
| <i>Leontopodium alpinum</i> Cass.                     | f/m | M. Wiedermann 9282                    | WU        | 38271         | Italy           | Piemonte, Sondrio, Livigno-Alpen                                     | 2630         | 2003-08-12 |
| <i>Leontopodium alpinum</i> Cass.                     | f/m | S. Safer & V. Vladimirov SS-SP-2      | WU        | 4989          | Bulgaria        | Plovdiv, Stara Planina                                               | 1640         | 2008-08-20 |
| <i>Leontopodium alpinum</i> Cass.                     | f/m | C. Gilli & A. Berger                  | WU        | 67124         | Austria         | Kärnten, Bezirk Spittal an der Drau, Innerfragant                    |              | 2010-07-16 |
| <i>Leontopodium andersonii</i> C.B. Clarke            | f   | S. Safer, S. Schwaiger & Y. Guo SSG31 | WU        | 44006         | China (Yunnan)  | Da Shi Village Heping; Sang Gui District                             | 2033         | 2008-09-08 |
| <i>Leontopodium andersonii</i> C.B. Clarke            | f   | S. Safer, S. Schwaiger & Y. Guo SSG27 | WU        | 43958         | China (Yunnan)  | Luquan; JiaoziShan                                                   | 3145         | 2008-09-21 |
| <i>Leontopodium andersonii</i> C.B. Clarke            | m   | H. Handel-Mazzetti 289                | W         | 1924 4654     | China (Yunnan)  | Yunnanfu [Kunming] N                                                 | 2200         | 1914-02-27 |
| <i>Leontopodium andersonii</i> C.B. Clarke            | m   | H. Handel-Mazzetti 5128               | W         | 1924 4851     | China (Sichuan) | Lungdschu-shan Mt. [Liangshan], Huili                                | 2100–3350    | 1914-09-16 |
| <i>Leontopodium andersonii</i> C.B. Clarke            | m   | H. Handel-Mazzetti 10048              | W         | 1924 2454     | China (Yunnan)  | Yangtse-Mekong divide, Weihsi – Djientschwan, Daidseidien – Schadien | 2500–2900    | 1916-09-20 |
| <i>Leontopodium artemisiifolium</i> (H.Lév.) Beauverd | f   | S. Safer, S. Schwaiger & Y. Guo SSG28 | WU        | 43959         | China (Yunnan)  | Luquan; JiaoziShan                                                   | 3135         | 2008-09-21 |
| <i>Leontopodium artemisiifolium</i> (H.Lév.) Beauverd | f   | S. Safer, S. Schwaiger & Y. Guo SSG13 | WU        | 43997         | China (Yunnan)  | Zhongdian; from Bitu Lake to Haba village                            | 2873         | 2008-09-11 |

Table 1. Continued

| Taxon                                                 | Sex | Collector no.           | Herbarium | Herbarium no. | Country (state) | Locality                                                                     | Altitude (m) | Date       |
|-------------------------------------------------------|-----|-------------------------|-----------|---------------|-----------------|------------------------------------------------------------------------------|--------------|------------|
| <i>Leontopodium artemisiifolium</i> (H.Lév.) Beauverd | m   | W.B. Dickoré 14574      | WU        | 38295         | China (Yunnan)  | Lijiang Range E                                                              | 3000         | 1996-07-31 |
| <i>Leontopodium artemisiifolium</i> (H.Lév.) Beauverd | m   | E.E. Maire s.n.         | W         | 1913 5234     | China (Yunnan)  | Tong-tchouan [Dongchuan]                                                     | 2600         | 1910-09-   |
| <i>Leontopodium artemisiifolium</i> (H.Lév.) Beauverd | m   | H. Smith 12629          | W         | 1940 9650     | China (Sichuan) | Taining (Ngata) – Maoniu (Ndrôme), Tjedji Vy.                                | 3200         | 1934-09-30 |
| <i>Leontopodium aurantiacum</i> Hand.-Mazz.           | f   | G. Forrest 27263        | W         | 1921 20051    | Myanmar         | N. E. Upper Burma                                                            | 3600–4000    | 1925-09    |
| <i>Leontopodium aurantiacum</i> Hand.-Mazz.           | m   | G. Forrest 26832        | W         | 1921 20051    | Myanmar         | N. E. Upper Burma                                                            | 3600–4000    | 1925-09    |
| <i>Leontopodium aurantiacum</i> Hand.-Mazz.           | m   | G. Forrest 24960        | W         | 1925 20052    | Myanmar         | NE Upper Burma, on the western flank of the Chimi-li N' Maikha-Salwin divide | 3600         | 1924-09    |
| <i>Leontopodium calocephalum</i> (Franch.) Beauverd   | f/m | H. Handel-Mazzetti 5492 | WU        | 69172         | China (Sichuan) | inter oppidum Yenyüen et castellum Kwapi                                     | –            | 1914-10-04 |
| <i>Leontopodium calocephalum</i> (Franch.) Beauverd   | f   | H. Handel-Mazzetti 8073 | WU        | 69173         | China (Yunnan)  | Ad confines Tibeticas sub jugo Dokerla                                       | –            | 1915-09-17 |
| <i>Leontopodium calocephalum</i> (Franch.) Beauverd   | f   | U. Wündisch 94-488-5    | WU        | 38296         | China (Sichuan) | Barkam                                                                       | 3350–3400    | 1994-10-03 |

Table 1. Continued

| Taxon                                               | Sex | Collector no.            | Herbarium | Herbarium no. | Country (state)  | Locality                                        | Altitude (m) | Date       |
|-----------------------------------------------------|-----|--------------------------|-----------|---------------|------------------|-------------------------------------------------|--------------|------------|
| <i>Leontopodium calocephalum</i> (Franch.) Beauverd | f/m | Bot. Garten Gießen (J80) | GI        | 007801        | China (Sichuan)  | Gansu, Min Shan                                 | 4100         | 2009-06-12 |
| <i>Leontopodium calocephalum</i> (Franch.) Beauverd | f   | Bot. Garten Gießen (J10) | GI        | 007795        | China (Sichuan)  | Min Shan                                        | 3500         | 2009-07-07 |
| <i>Leontopodium calocephalum</i> (Franch.) Beauverd | f/m | Bot. Garten Gießen (J56) | GI        | 007795        | China (Sichuan)  | Min Shan, alpine meadows                        | 3800         | 2009-07-07 |
| <i>Leontopodium calocephalum</i> (Franch.) Beauverd | m   | H. Smith 12017           | W         | 1940 9644     | China (Sichuan)  | Sikang; between Taining and Taofu               | 3800         | 1934-10-09 |
| <i>Leontopodium calocephalum</i> (Franch.) Beauverd | m   | Rück 18315               | W         | 1931 3503     | China (Sichuan)  | Mt. Mitzuga                                     | 4460         | 1939-09    |
| <i>Leontopodium pusillum</i> (Beauverd) Hand.-Mazz. | f/m | G. & S. Miede 7480       | GOET      |               | China (Xinjiang) | Kunlun Shan, Tiznap Valley, N Kudi              | 3300         | 1992-07-09 |
| <i>Leontopodium pusillum</i> (Beauverd) Hand.-Mazz. | m   | G. & S. Miede 7614       | GOET      |               | China (Xinjiang) | Kunlun Shan, Upper Tiznap Valley, SE Kudi       | 4200-4300    | 1992-07-10 |
| <i>Leontopodium pusillum</i> (Beauverd) Hand.-Mazz. | f   | G. & S. Miede 7476       | GOET      |               | China (Xinjiang) | Kunlun, Kudi Kunlun Shan, Tiznap Valley, N Kudi | 3080-3200    | 1992-07-09 |
| <i>Leontopodium pusillum</i> (Beauverd) Hand.-Mazz. | m   | G. & S. Miede 8220       | GOET      |               | China (Xinjiang) | Aksai Chin                                      | 5150         | 1992-07-05 |



Table 1. Continued

| Taxon                                                      | Sex | Collector no.                      | Herbarium | Herbarium no. | Country (state)  | Locality                         | Altitude (m) | Date       |
|------------------------------------------------------------|-----|------------------------------------|-----------|---------------|------------------|----------------------------------|--------------|------------|
| <i>Leontopodium pusillum</i> (Beauverd) Hand.-Mazz.        | f   | G.&S.Miehe 8231                    | GOET      |               | China (Xinjiang) | Aksai Chin                       | 5100         | 1992-07-05 |
| <i>Leontopodium pusillum</i> (Beauverd) Hand.-Mazz.        | f   | G.&S.Miehe 7875a                   | GOET      |               | China (Xinjiang) | Karakash Valley, SE Dahongliutan | 4800-4850    | 1992-07-05 |
| <i>Leontopodium dedekensii</i> (Bureau & Franch.) Beauverd | f/m | G.Miehe 07-012-02                  | WU        | 43965         | China (Qinghai)  | 35.55°N/99.85°E                  | 3280         | 2007-08-31 |
| <i>Leontopodium dedekensii</i> (Bureau & Franch.) Beauverd | m   | G.Miehe 07-012-01                  | WU        | 43964         | China (Qinghai)  | 35.55°N/99.85°E                  | 3280         | 2007-08-31 |
| <i>Leontopodium dedekensii</i> (Bureau & Franch.) Beauverd | f/m | S.Safer, S.Schwaiger & Y.Guo 17    | WU        | 43994         | China (Yunnan)   | Benzilan, Dongzhulin Monastery   | 2780         | 2008-09-13 |
| <i>Leontopodium discolor</i> Beauverd                      | f/m | Faurie 8489                        | WU        | 8982 13-83/1  | Japan            | Rebunshiri                       | –            | 1899-08-01 |
| <i>Leontopodium discolor</i> Beauverd                      | f/m | Faurie 3405                        | WU        | 8982 13-83/2  | Japan            | Rebunshiri                       | –            | 1892-07-31 |
| <i>Leontopodium franchetii</i> Beauverd                    | f   | S.Safer, S.Schwaiger & Y.Guo SSG09 | WU        | 44016         | China (Yunnan)   | Zhongdian                        | 3287         | 2008-09-10 |
| <i>Leontopodium franchetii</i> Beauverd                    | f/m | S.Safer, S.Schwaiger & Y.Guo SSG15 | WU        | 44008         | China (Yunnan)   | Zhongdian                        | 3746         | 2008-09-12 |
| <i>Leontopodium franchetii</i> Beauverd                    | f   | S.Safer, S.Schwaiger & Y.Guo SSG15 | WU        | 44008         | China (Yunnan)   | Zhongdian                        | 3746         | 2008-09-12 |

Table 1. Continued

| Taxon                                            | Sex | Collector no.                      | Herbarium | Herbarium no. | Country (state) | Locality                                                                  | Altitude (m) | Date       |
|--------------------------------------------------|-----|------------------------------------|-----------|---------------|-----------------|---------------------------------------------------------------------------|--------------|------------|
| <i>Leontopodium franchetii</i> Beauverd          | m   | H.Hand.-Mazz. 4616                 | W         | 1923 3629     | China (Yunnan)  | Inter vicos Alo et Halao-Dschungdien Sikang, Taofu, distr.: Taining       | 3500         | 1914-08-09 |
| <i>Leontopodium franchetii</i> Beauverd          | m   | H. Smith 11762                     | W         | 1940 9633     | China/          |                                                                           | 3600         | 1934-09-04 |
| <i>Leontopodium giraldii</i> Diels               | m   | G. Giraldis.n.                     | W         | 1926 1875     | China (Shaanxi) | T'ai pa shan                                                              |              | 1893-08    |
| <i>Leontopodium haastioides</i> Hand.-Mazz.      | f   | W.B.Dickoré 9892                   | WU        | 38291         | China (Xizang)  | Xizang, S Tibet. Nagarze – Pomo Co. S of Dalung                           | 4700         | 1994-07-23 |
| <i>Leontopodium haastioides</i> Hand.-Mazz.      | m   | F.E.Youngusband s.n.               | W         | -             | China (Xizang)  | [Tibet austr.,] Gyamtsoma (near source of Teesta) Shaluli Shan            | 4876         | 1903-07-19 |
| <i>Leontopodium haplophyllloides</i> Hand.-Mazz. | f/m | Bot. Garten Gießen (J11)           | GI        | 007826        | China (Sichuan) |                                                                           | 4200         | 2009-08-15 |
| <i>Leontopodium haplophyllloides</i> Hand.-Mazz. | m   | Bot. Garten Gießen (J157)          | GI        | 010306        | China (Sichuan) | Between Zaige and Songpan                                                 | 3600         | 2010-10-12 |
| <i>Leontopodium haplophyllloides</i> Hand.-Mazz. | f/m | HS 12131                           | W         | 1940 9625     | China (Sichuan) | Sikang, between Taining and Taofu                                         | 3900         | 1934-09-13 |
| <i>Leontopodium himalayanicum</i> DC.            | f/m | HS 4046                            | W         | 1924 2068     | China (Sichuan) | Huang-chen-huan                                                           | 3300         | 1922-08-19 |
| <i>Leontopodium himalayanicum</i> DC.            | f/m | BD W.B.Dickoré 5228                | WU        | 38287         | China (Xizang)  | SE Tibet, Namchabarwa, Nam La Tso                                         | 4400         | 1989-09-14 |
| <i>Leontopodium himalayanicum</i> DC.            | f   | S.Safer, S.Schwaiger & Y.Guo SSG18 | WU        | 43993         | China (Yunnan)  | Deqen; from Zhongdian to Deqen, pass facing the Meili Snow Mountain group | 4316         | 2008-09-13 |

Table 1. Continued

| Taxon                                              | Sex | Collector no.                      | Herbarium | Herbarium no. | Herbarium | Country (state)  | Locality                                                                | Altitude (m) | Date       |
|----------------------------------------------------|-----|------------------------------------|-----------|---------------|-----------|------------------|-------------------------------------------------------------------------|--------------|------------|
| <i>Leontopodium himalayanicum</i> DC.              | f   | S.Safer, S.Schwaiger & Y.Guo SSG12 | WU        | 44000         |           | China (Yunnan)   | Zhongdian; from Bitu Lake to Haba village                               | 3582         | 2008-09-11 |
| <i>Leontopodium jacobianum</i> Beauverd            | f/m | H.Handel-Mazzetti 9672             | WU        | 69171         |           | China (Yunnan)   | In montium interfluvios Landsang-djiang (Mekong) et Lu-djiang (Salween) | 3450         | 1916-08-04 |
| <i>Leontopodium jacobianum</i> Beauverd            | m   | K.Reiter 571                       | WU        | 38297         |           | Nepal            | Langtang Valley, Kyangjin                                               | 3780         | 1995-08-24 |
| <i>Leontopodium japonicum</i> Miq.                 | f/m | G.-Y.Rao 01                        | WU        | 43992         |           | China (Hubei)    | Shennongjia Mt                                                          | 2600         | 2008-08-08 |
| <i>Leontopodium japonicum</i> Miq.                 | f/m | Faurie 183                         | WU        | 8982 13-83/5  |           | Japan            | Asamayama                                                               | –            | 1897-07-20 |
| <i>Leontopodium japonicum</i> Miq.                 | f/m | U.J.Faurie 183                     | WU        | 8982 13-83/8  |           | Japan            | Asamayama                                                               | –            | 1897-07-20 |
| <i>Leontopodium leontopodium</i> (DC.) Hand.-Mazz. | f/m | U.Wündisch 462                     | GOET      |               |           | China (Xinjiang) | SW Xinjiang, Upper Ojtagh Valley                                        | 2805         | 1998-07-18 |
| <i>Leontopodium leontopodium</i> (DC.) Hand.-Mazz. | f   | U.Wündisch 371                     | GOET      |               |           | China (Xinjiang) | SW Xinjiang, Upper Ojtagh Valley                                        | 2885         | 1998-07-16 |
| <i>Leontopodium leontopodium</i> (DC.) Hand.-Mazz. | f/m | U.Wündisch 258                     | GOET      |               |           | China (Xinjiang) | SW Xinjiang, Upper Ojtagh Valley                                        | 2615         | 1998-07-16 |
| <i>Leontopodium leontopodium</i> (DC.) Hand.-Mazz. | f/m | E.Eberhardt 98-533                 | GOET      |               |           | Pakistan         | Karakorum, Hunza, Khorzoite                                             | 3400         | 1998-07-16 |

Table 1. Continued

| Taxon                                                 | Sex | Collector no.                | Herbarium | Herbarium no. | Country (state)  | Locality                         | Altitude (m) | Date       |
|-------------------------------------------------------|-----|------------------------------|-----------|---------------|------------------|----------------------------------|--------------|------------|
| <i>Leontopodium leontopodium</i> (DC.)<br>Hand.-Mazz. | f   | <i>E.Eberhardt</i><br>98-422 | GOET      |               | Pakistan         | Karakorum, Hunza, Kirgaswashk    | 3200         | 1998-07-15 |
| <i>Leontopodium leontopodium</i> (DC.)<br>Hand.-Mazz. | f/m | <i>U.Schischhoff</i>         | GOET      |               | Pakistan         | NW Himalaya, Diamir Nullah       | 3150         | 1994-07-16 |
| <i>Leontopodium leontopodium</i> (DC.)<br>Hand.-Mazz. | f/m | <i>E.Eberhardt</i><br>1131   | GOET      |               | Pakistan         | Karakorum, Batura, Wudmur        | 3850         | 1994-07-19 |
| <i>Leontopodium leontopodium</i> (DC.)<br>Hand.-Mazz. | f/m | <i>E.Eberhardt</i><br>1182   | GOET      |               | Pakistan         | Karakorum, Batura, Wudmur        | 3700         | 1994-07-19 |
| <i>Leontopodium leontopodium</i> (DC.)<br>Hand.-Mazz. | f/m | <i>E.Eberhardt</i><br>3348   | GOET      |               | Pakistan         | Karakorum, Batura, Guchism       | 3955         | 1994-08-13 |
| <i>Leontopodium leontopodium</i> (DC.)<br>Hand.-Mazz. | f   | <i>E.Eberhardt</i><br>3349   | GOET      |               | Pakistan         | Karakorum, Batura, Guchism       | 3955         | 1994-08-13 |
| <i>Leontopodium leontopodium</i> (DC.)<br>Hand.-Mazz. | f/m | <i>E.Eberhardt</i><br>1176   | GOET      |               | Pakistan         | Karakorum, Batura, Wudmur        | 3700         | 1994-07-19 |
| <i>Leontopodium leontopodium</i> (DC.)<br>Hand.-Mazz. | f/m | <i>E.Eberhardt</i><br>1276   | GOET      |               | Pakistan         | Karakorum, Batura, Wudmur        | 3800         | 1994-07-20 |
| <i>Leontopodium leontopodium</i> (DC.)<br>Hand.-Mazz. | f/m | <i>U.Wündisch</i><br>29      | GOET      |               | China (Xinjiang) | SW Xinjiang, Upper Ojtagh Valley | 3050         | 1998-06-22 |

Table 1. Continued

| Taxon                                                 | Sex | Collector no.           | Herbarium | Herbarium no. | Herbarium                     | Country (state)                                                                                                      | Locality  | Altitude (m) | Date |
|-------------------------------------------------------|-----|-------------------------|-----------|---------------|-------------------------------|----------------------------------------------------------------------------------------------------------------------|-----------|--------------|------|
| <i>Leontopodium leontopodium</i> (DC.) Hand.-Mazz.    | f   | Tribsch & Essel 9802    | WU        | 38279         | Russian Federation            | Altay. Ridge between the valley of river Sarzhematy (Sarzhematy) and the valley of river Kalanegyri Kashmir, Gulmarg | 2500-3348 | 2003-08-05   |      |
| <i>Leontopodium leontopodium</i> (DC.) Hand.-Mazz.    | m   | J.F. Duthie 11223       | WU        | 69174         | India (Jammu and Kashmir)     |                                                                                                                      | 2450-2750 | 1892-05-25   |      |
| <i>Leontopodium leontopodium</i> (DC.) Hand.-Mazz.    | m   | S.A.Harriss 16255       | WU        | 69175         | Pakistan (Khyber Pakhtunkhwa) | Guger                                                                                                                | 2750      | 1895-05-18   |      |
| <i>Leontopodium leontopodioides</i> (Willd.) Beauverd | f   | G.Miehe & al. 07-006-02 | WU        | 43969         | China                         | No loc. 35.56°N/99.85°E                                                                                              | 3180      | 2007-08-31   |      |
| <i>Leontopodium leontopodioides</i> (Willd.) Beauverd | m   | G.Miehe & al. 07-006-03 | WU        | 43968         | China                         | No loc. 35.56°N/99.85°E                                                                                              | 3180      | 2007-08-31   |      |
| <i>Leontopodium leontopodioides</i> (Willd.) Beauverd | f/m | G.Miehe & al. 07-006-05 | WU        | 43967         | China                         | No loc. 35.56°N/99.85°E                                                                                              | 3180      | 2007-08-31   |      |
| <i>Leontopodium lingianum</i> (Y.L.Chen) Dickoré      | f   | W.B.Dickoré 11363       | WU        | 38301         | China (Xizang)                | SE Tibet. Gyala Peri N, Ridge W of Gyala Peri-N Glacier                                                              | 4550      | 1994-08-19   |      |
| <i>Leontopodium lingianum</i> (Y.L.Chen) Dickoré      | m   | W.B.Dickoré 10836       | WU        | 38302         | China (Xizang)                | SE Tibet. Tsangpo tributary, Nangxian - Mainling. Lilung Chu Eastern branch (High Camp)                              | 4850      | 1994-08-11   |      |

Table 1. Continued

| Taxon                                                                   | Sex | Collector no.                                      | Herbarium | Herbarium no. | Country (state)     | Locality                                                                                                     | Altitude (m)     | Date       |
|-------------------------------------------------------------------------|-----|----------------------------------------------------|-----------|---------------|---------------------|--------------------------------------------------------------------------------------------------------------|------------------|------------|
| <i>Leontopodium microphyllum</i> Hayata                                 | f/m | E.Hörandl, Chien-I-Huang Huang, Chien-Hua Liu 9549 | WU        | 4795 13-83/13 | Taiwan              | Nantou County, Central Mountains, Mt Hohuan, along central cross-island highway, from Wuling to Hohuan Lodge | 3230             | 2004-09-29 |
| <i>Leontopodium monocephalum</i> Edgew.                                 | f   | Staubinger N16/3                                   | W         | 2005 01062    | Nepal               | Chukhung, Solo Khumbu                                                                                        | 4800             | 1997-10-18 |
| <i>Leontopodium monocephalum</i> Edgew.                                 | m   | J.F.Duthie 816                                     | W         | 1924 12098    | India (Uttarakhand) | NW Himalaya, Tehri                                                                                           | 4500-4900        | 1883-08-09 |
| <i>Leontopodium monocephalum</i> Edgew.                                 | f   | Smith & G.H.Cave                                   | W         | 1924 12098    | India (Sikkim)      | Garhwal Sikkim                                                                                               | 4700             | 1909-08-06 |
| <i>Leontopodium muscoides</i> Hand.-Mazz.                               | f/m | G.Forrest 20724                                    | W         | 1924 1117     | China (Yunnan)      | 24°30'N, 98°56'E                                                                                             | 4400 m           | 1921-09-   |
| <i>Leontopodium muscoides</i> Hand.-Mazz.                               | f   | F.K.Ward 5375                                      | W         | 1924 1127     | China (Yunnan)      | Danyon                                                                                                       | 5180 (17 000 ft) | 1922-09    |
| <i>Leontopodium muscoides</i> Hand.-Mazz.                               | f/m | G.Forrest 12989                                    | W         | 1924 1120     | China (Yunnan)      | Mekang – Yangtze                                                                                             | 3960 (13 000 ft) | 1914-08-   |
| <i>Leontopodium nanum</i> (C.B.Clarke ex Hook.f. & Thomson) Hand.-Mazz. | f   | Dawnogorski 121                                    | W         | 1925 3808     | China (Xinjiang)    | Kaschgar                                                                                                     | –                | 1909-06-22 |

Table 1. Continued

| Taxon                                                                   | Sex | Collector no.                         | Herbarium | Herbarium no. | Country (state)         | Locality          | Altitude (m)     | Date             |
|-------------------------------------------------------------------------|-----|---------------------------------------|-----------|---------------|-------------------------|-------------------|------------------|------------------|
| <i>Leontopodium nanum</i> (C.B.Clarke ex Hook.f. & Thomson) Hand.-Mazz. | m   | N.M.Przewalski                        | W         | 1925 10255    | China (Qinghai)         | Tibet, fl. Yangze | 3960 (13 000 ft) | 1884-06-13 to 25 |
| <i>Leontopodium nanum</i> (C.B.Clarke ex Hook.f. & Thomson) Hand.-Mazz. | f/m | N.M.Przewalski 154                    | W         | 1925 10255    | China (Qinghai)         | Tibet, fl. Yangze | -                | 1884-06-12 to 24 |
| <i>Leontopodium nanum</i> (C.B.Clarke ex Hook.f. & Thomson) Hand.-Mazz. | f/m | W.Koelz 2179                          | W         | 1935 1322     | India (Jammu & Kashmir) | Puga, Rupshu      | 4570 (15 000 ft) | 1931-07-04       |
| <i>Leontopodium nivale</i> (Ten.) Huet ex Hand.-Mazz.                   | m   | M. de Sardagna, Plantae Italicae s.n. | WU        | 69169         | Italy                   | Abbruzzo          |                  | 1887             |
| <i>Leontopodium nivale</i> (Ten.) Huet ex Hand.-Mazz.                   | f/m | H.Groves s.n.                         | WU        | 69170         | Italy                   | Majella           | 2750             | 1880-08          |
| <i>Leontopodium nivale</i> (Ten.) Huet ex Hand.-Mazz.                   | f   | S.Safer, V.Vladimirov SS-P-1          | WU        | 43988         | Bulgaria                | Bansko, Pirin     | 2385             | 2008-08-13       |
| <i>Leontopodium ochroleucum</i> Beauverd                                | f   | G.&S.Miehe 2746                       | GOET      |               | Pakistan                | Karakorum         | 4270             | 1990-08-26       |
| <i>Leontopodium ochroleucum</i> Beauverd                                | f   | G.&S.Miehe 2780                       | GOET      |               | Pakistan                | Karakorum         | 4260             | 1990-08-26       |
| <i>Leontopodium ochroleucum</i> Beauverd                                | f/m | G.&S.Miehe 2866                       | GOET      |               | Pakistan                | Karakorum         | 4260-4370        | 1990-08-27       |

Table 1. Continued

| Taxon                                    | Sex | Collector no.                      | Herbarium | Herbarium no. | Country (state)  | Locality                                                                        | Altitude (m) | Date       |
|------------------------------------------|-----|------------------------------------|-----------|---------------|------------------|---------------------------------------------------------------------------------|--------------|------------|
| <i>Leontopodium ochroleucum</i> Beauverd | m   | G.&S.Miehe 8442                    | GOET      |               | China (Xinjiang) | Kunlun-Aksai Chin Tiznap                                                        | 4200         | 1990-07-09 |
| <i>Leontopodium ochroleucum</i> Beauverd | m   | G.&S.Miehe 8373                    | GOET      |               | China (Xinjiang) | Kunlun-Aksai Chin, Kunlun                                                       | 4880         | 1990-07-10 |
| <i>Leontopodium ochroleucum</i> Beauverd | f   | G.&S.Miehe 951206                  | GOET      |               | Pakistan         | Deosai Lake                                                                     | 4050         | 1995-09-23 |
| <i>Leontopodium ochroleucum</i> Beauverd | f   | W.B.Dickoré 17837                  | WU        | 43979         | Tajikistan       | Gorno-Badakshan, East Pamir, Takhtakorom, N Gudara Mts, Uruchbulak-Ailutek P.S. | 4200         | 2002-09-06 |
| <i>Leontopodium roseum</i> Hand.-Mazz.   | f/m | H.Smith 12190                      | W         | 1940 9601     | China (Sichuan)  | Sikang, Taofu                                                                   | 2900         | 1934-09-17 |
| <i>Leontopodium sinense</i> Hemsl.       | f   | S.Safer, S.Schwaiger & Y.Guo SSG04 | WU        | 43976         | China (Yunnan)   | Dali; Cang Shan Mt                                                              | 2216–2482    | 2008-09-07 |
| <i>Leontopodium sinense</i> Hemsl.       | f/m | H.Hand.-Mazz. 9780                 | WU        | 69167         | China (Yunnan)   | Ad fluvium Lu-djiang (Salween)                                                  | 2050         | 1916-08-09 |
| <i>Leontopodium sinense</i> Hemsl.       | f   | S.Safer, S.Schwaiger & Y. Guo 04   | WU        | 43976         | China (Yunnan)   | Dali; Cang Shan Mt                                                              | 2216–2482    | 2008-09-07 |
| <i>Leontopodium souliei</i> Beauverd     | f   | W.B.Dickoré 13167                  | GOET      |               | Pakistan         | NW Himalaya, Hazara, Mt Makra                                                   | 3800         | 1995-09-14 |
| <i>Leontopodium souliei</i> Beauverd     | f   | W.B.Dickoré 13144                  | GOET      |               | Pakistan         | NW Himalaya, Hazara, Mt Makra                                                   | 3610         | 1995-09-14 |
| <i>Leontopodium souliei</i> Beauverd     | f   | W.B.Dickoré 13129                  | GOET      |               | Pakistan         | NW Himalaya, Hazara, Mt Makra                                                   | 3570         | 1995-09-14 |



Table 1. Continued

| Taxon                                    | Sex | Collector no.                       | Herbarium | Herbarium no. | Country (state) | Locality                                                                      | Altitude (m) | Date       |
|------------------------------------------|-----|-------------------------------------|-----------|---------------|-----------------|-------------------------------------------------------------------------------|--------------|------------|
| <i>Leontopodium souliei</i>              | m   | H.Hand.-Mazz. 7515                  | WU        | 69165         | China (Sichuan) | Muli – Yungning, Hwayi                                                        | 3200         | 1915-08-07 |
| Beauverd                                 |     |                                     |           |               |                 |                                                                               |              |            |
| <i>Leontopodium souliei</i>              | m   | S.Safer, S.Schwaiger & Y.Guo SSG30  | WU        | 44014         | China (Yunnan)  | Zhongdian                                                                     | 3347         | 2008-09-12 |
| Beauverd                                 |     |                                     |           |               |                 |                                                                               |              |            |
| <b>L. sp. nov.</b>                       | f/m | W.B.Dickoré 10529                   | WU        | 38293         | China (Xizang)  | SE Tibet. Tsangpo Vy., Nangxian – Mainling. Vy. 10 km W of Gyemdong (Camp 13) | 3350         | 1994-08-04 |
| <b>L. sp. nov.</b>                       | f   | H.Hand.-Mazz. 8038                  | W         | 1924 2445     | China (Yunnan)  | Ad confines Tibeticas sub jugo Dokerla                                        | 3600         | 1915-09-19 |
| <i>Leontopodium stracheyi</i> (Hook.f.)  | f   | S.Safer, S.Schwaiger & Y.Guo MSMT 1 | WU        | 44005         | China (Yunnan)  | Deqen; National Park Mei Li Snow Mt                                           | 3055         | 2008-09-14 |
| <i>Leontopodium stracheyi</i> (Hook.f.)  | f   | H.Hand.-Mazz. 80832                 | WU        | 69164         | China (Yunnan)  | Ad confines Tibeticas sub jugo Dokerla                                        | 3750         | 1915-09-16 |
| C.B. Clarke ex Hemsl.                    |     |                                     |           |               |                 |                                                                               |              |            |
| <i>Leontopodium stracheyi</i> (Hook.f.)  | m   | H.Smith 11925                       | W         | 1940 9556     | China (Sichuan) | Sikang, Taofu, distr.: Taining                                                | 3600         | 1934-09-08 |
| .B. Clarke ex Hemsl.                     |     |                                     |           |               |                 |                                                                               |              |            |
| <i>Leontopodium stracheyi</i> (Hook.f.)  | m   | H.Smith 13765                       | W         | 1940 9554     | China (Sichuan) | Sikang, Taofu, distr.: Taining cult. e sem. in hort. Upsal.                   | 2700         | 1934-08-12 |
| C.B. Clarke ex Hemsl.                    |     |                                     |           |               |                 |                                                                               |              |            |
| <i>Leontopodium villosum</i> Hand.-Mazz. | f/m | K.L.Chu, 3357                       | W         | 1950 15874    | China (Sichuan) | Pao-hsing-hsien                                                               | 4000         | 1936-08-12 |

Table 1. Continued

| Taxon                                 | Sex | Collector no.                   | Herbarium | Herbarium no. | Herbarium      | Country (state)                          | Locality | Altitude (m) | Date       |
|---------------------------------------|-----|---------------------------------|-----------|---------------|----------------|------------------------------------------|----------|--------------|------------|
| <i>Leontopodium wilsonii</i> Beauverd | f/m | S.Safer, S.Schwaiger & Y.Guo 26 | WU        | 43960         | China (Yunnan) | Luquan; on top of Jiaozi Shan            |          | 4162         | 2008-09-21 |
| <i>Leontopodium wilsonii</i> Beauverd | f/m | W.B.Dickoré 14040               | WU        | 38300         | China (Yunnan) | Yunnan NW, Dali Xian. Cangshan W of Dali |          | 3440         | 1996-07-29 |

in the genus. A group of cells forms distinctive structures at the end of the tip that can be divided into the following subcategories.

*No structure at the end* (Fig. 1A): the structure of the tip cannot be distinguished from the rest of the bristle; it ends bluntly.

*Elongated end cells* (Fig. 1B): the bristle ends in one or a maximum of two thin, elongated end cells.

*Accumulation of elongated cells* (Fig. 1C): the bristle ends in an accumulation of elongated cells that form small barbs; the tip is not clavate.

*Tip of round cells* (Fig. 1D): the cells of a clearly distinguishable tip are not elongated but round instead; they do not stick out of the bristle and form no barbs.

*Fan tip* (Fig. 1E): the tip is extremely clavate, and the cells are elongated and spread out, appearing like a fan, because it is broader and shorter than the tree-like tips.

*Tree-like tip* (see Fig. 1F): many cells of the more or less clavate bristle stick out of the bristle and form a clearly defined tree-like tip.

*Button-like barbs* (Fig. 1G): some cells form button-like barbs in the tip region.

*Bristle length* (Fig. 1H, I): Three character states were established: < 3 mm; 3–4 mm; and > 4 mm.

*Colour of the pappus bristles* (Fig. 1J): The sexes and species were divided into two groups: those with normal white bristles; and those with coloured bristles, usually slightly brown or golden especially at the tip.

*Number of barbs on the bristle* (Fig. 1K–M): The three categories in ascending order are: no (or nearly no) barbs; some barbs; or many barbs. To make sure that this category does not interfere with the tip, the surface of the pappus bristle in the lowermost third was examined.

*Kind of barbs on the bristle* (Fig. 2A–C): There are three kinds of barbs: miniature; long and thin; and massive.

*Thickness of the pappus bristle* (Fig. 2D–F): The thickness was determined by counting the numbers of cells visible in top view in the outer layer of the pappus bristle. If containing up to three rows of cells, the bristle was designated as thin, with four or five cell rows as medium, and with five or more cell rows as large.

*Number of pappus bristles* (Fig. 2G, H): The number of pappus bristles was counted only on an undamaged pappus. For this character intraspecific

**Table 2.** Characters and character states

| species                        | sex | Subgroups section <i>Nobilia</i> (n), Himalayan Group (him), plants forming soft and dense cushions (cu) distribution Europe (eur) |   |   |   |   |   |   |   |   |    |    |    |    |    |    |    |    |    |    |    | number of bristles<br>(PCoA : number ≤ 24 vs. number ≥ 25) | 1: finest conditions for wind dispersal, 2: wind dispersal might work in a diminished way, 3: wind dispersal not possible.<br>1: alp. heathland (low, dense, wet, acidic), 2: alp. steppe (open, dry, disperse, medium high, usually alkaline) 3: alp. turf (closed, moderately moist, usually low), 4: mont. steppe, 5: subalp. steppe, 6: mont. heathland, moist, acidic, 7: mont.-subalp. steppe forest, 8: subtrop. heathland/low scrub, seasonally dry, 9: subtrop. grassland/meadow, seasonally moist, 10: subalp. steppe /steppe forest, 11: temp. scrub/open forest. |   |
|--------------------------------|-----|------------------------------------------------------------------------------------------------------------------------------------|---|---|---|---|---|---|---|---|----|----|----|----|----|----|----|----|----|----|----|------------------------------------------------------------|------------------------------------------------------------------------------------------------------------------------------------------------------------------------------------------------------------------------------------------------------------------------------------------------------------------------------------------------------------------------------------------------------------------------------------------------------------------------------------------------------------------------------------------------------------------------------|---|
|                                |     | 1                                                                                                                                  | 2 | 3 | 4 | 5 | 6 | 7 | 8 | 9 | 10 | 11 | 12 | 13 | 14 | 15 | 16 | 17 | 18 | 19 | 20 |                                                            |                                                                                                                                                                                                                                                                                                                                                                                                                                                                                                                                                                              |   |
| <i>character number (PCoA)</i> |     |                                                                                                                                    |   |   |   |   |   |   |   |   |    |    |    |    |    |    |    |    |    |    |    | 21                                                         |                                                                                                                                                                                                                                                                                                                                                                                                                                                                                                                                                                              |   |
| <i>L. discolor</i>             | f   |                                                                                                                                    | x |   |   |   | x | x |   |   |    |    |    |    |    | x  |    |    |    | x  |    | 16 20 25                                                   | 1                                                                                                                                                                                                                                                                                                                                                                                                                                                                                                                                                                            | 3 |
| <i>L. jacotianum</i>           | f   |                                                                                                                                    | x |   |   |   | x |   |   |   |    |    |    |    |    | x  | x  |    |    |    |    | 31                                                         | 2                                                                                                                                                                                                                                                                                                                                                                                                                                                                                                                                                                            | 7 |
| <i>L. microphyllum</i>         | f   |                                                                                                                                    |   | x |   |   | x |   |   | x |    |    |    |    |    | x  | x  |    |    |    |    |                                                            | 1                                                                                                                                                                                                                                                                                                                                                                                                                                                                                                                                                                            | 1 |
| <i>L. monocephalum</i>         | f   |                                                                                                                                    | x |   |   |   | x |   |   | x |    |    |    |    |    |    | x  | x  |    |    |    | 39 13                                                      | 1                                                                                                                                                                                                                                                                                                                                                                                                                                                                                                                                                                            | 2 |
| <i>L. roseum</i>               | f   |                                                                                                                                    | x |   |   |   | x |   |   |   |    |    | x  |    |    | x  | x  |    |    |    |    | 15 22                                                      | 2                                                                                                                                                                                                                                                                                                                                                                                                                                                                                                                                                                            | 7 |
| <i>L. villosum</i>             | f   |                                                                                                                                    | x |   |   |   | x |   |   | x |    |    |    |    |    | x  |    |    | x  | x  |    | 32                                                         | 1                                                                                                                                                                                                                                                                                                                                                                                                                                                                                                                                                                            | 6 |
| <i>L. wilsonii</i>             | f   |                                                                                                                                    | x |   |   |   | x | x |   |   |    |    |    |    |    | x  | x  |    |    |    |    | 25 20 20 18                                                | 1                                                                                                                                                                                                                                                                                                                                                                                                                                                                                                                                                                            | 6 |
| <i>L. discolor</i>             | m   |                                                                                                                                    | x |   |   |   | x |   |   |   | x  |    |    |    |    | x  |    |    | x  |    |    | 26 23 26                                                   | 1                                                                                                                                                                                                                                                                                                                                                                                                                                                                                                                                                                            | 3 |
| <i>L. giraldii</i>             | m   |                                                                                                                                    | x |   |   |   | x |   |   | x |    |    |    |    |    | x  |    |    | x  | x  |    | 42                                                         | 1                                                                                                                                                                                                                                                                                                                                                                                                                                                                                                                                                                            | 6 |
| <i>L. jacotianum</i>           | m   |                                                                                                                                    | x |   |   |   | x |   |   |   | x  |    |    |    |    | x  | x  |    |    |    |    | 39 17 23 13                                                | 2                                                                                                                                                                                                                                                                                                                                                                                                                                                                                                                                                                            | 7 |
| <i>L. microphyllum</i>         | m   |                                                                                                                                    |   | x |   |   |   |   |   | x |    |    |    |    |    | x  | x  |    |    |    |    |                                                            | 1                                                                                                                                                                                                                                                                                                                                                                                                                                                                                                                                                                            | 1 |
| <i>L. monocephalum</i>         | m   |                                                                                                                                    | x |   |   |   |   |   |   |   | x  |    |    |    |    | x  |    |    | x  |    |    | 17 15                                                      | 1                                                                                                                                                                                                                                                                                                                                                                                                                                                                                                                                                                            | 2 |
| <i>L. roseum</i>               | m   |                                                                                                                                    | x |   |   |   | x |   |   |   |    | x  |    |    |    | x  |    |    | x  |    |    | 21                                                         | 2                                                                                                                                                                                                                                                                                                                                                                                                                                                                                                                                                                            | 7 |
| <i>L. villosum</i>             | m   |                                                                                                                                    | x |   |   |   | x |   |   |   |    |    |    |    |    | x  |    |    | x  | x  |    | 32                                                         | 1                                                                                                                                                                                                                                                                                                                                                                                                                                                                                                                                                                            | 6 |
| <i>L. wilsonii</i>             | m   |                                                                                                                                    | x |   |   |   | x | x |   |   |    |    |    |    |    | x  |    |    | x  |    |    | 22 21                                                      | 1                                                                                                                                                                                                                                                                                                                                                                                                                                                                                                                                                                            | 6 |
| <i>L. aurantiacum</i>          | f   | cu                                                                                                                                 | x |   |   |   | x | x |   |   |    |    |    |    |    | x  |    |    | x  | x  |    | 33                                                         | 1                                                                                                                                                                                                                                                                                                                                                                                                                                                                                                                                                                            | 1 |
| <i>L. haastioides</i>          | f   | cu                                                                                                                                 | x |   |   |   | x |   |   | x |    |    |    |    |    | x  |    |    | x  |    |    | 31                                                         | 1                                                                                                                                                                                                                                                                                                                                                                                                                                                                                                                                                                            | 2 |
| <i>L. lingianum</i>            | f   | cu                                                                                                                                 | x |   |   |   |   |   |   | x |    |    |    |    |    | x  |    |    |    |    |    | 24                                                         | 1                                                                                                                                                                                                                                                                                                                                                                                                                                                                                                                                                                            | 1 |
| <i>L. muscoides</i>            | f   | cu                                                                                                                                 | x |   |   |   | x | x |   |   |    |    |    |    |    | x  |    |    | x  |    |    | 21 19 24                                                   | 1                                                                                                                                                                                                                                                                                                                                                                                                                                                                                                                                                                            | 1 |
| <i>L. aurantiacum</i>          | m   | cu                                                                                                                                 | x |   |   |   | x |   |   | x |    |    |    |    |    | x  |    |    | x  | x  |    | 23 23                                                      | 1                                                                                                                                                                                                                                                                                                                                                                                                                                                                                                                                                                            | 1 |
| <i>L. haastioides</i>          | m   | cu                                                                                                                                 | x |   |   |   | x |   |   | x |    |    |    |    |    | x  |    |    | x  |    |    | 62                                                         | 1                                                                                                                                                                                                                                                                                                                                                                                                                                                                                                                                                                            | 2 |
| <i>L. lingianum</i>            | m   | cu                                                                                                                                 | x |   |   |   |   |   |   | x |    |    |    |    |    | x  |    |    | x  |    |    | 25 30                                                      | 1                                                                                                                                                                                                                                                                                                                                                                                                                                                                                                                                                                            | 1 |
| <i>L. muscoides</i>            | m   | cu                                                                                                                                 | x |   |   |   |   |   |   | x |    |    |    |    |    | x  |    |    | x  | x  |    | 26 28                                                      | 1                                                                                                                                                                                                                                                                                                                                                                                                                                                                                                                                                                            | 1 |
| <i>L. alpinum</i>              | f   | eur                                                                                                                                | x |   |   |   |   | x | x |   |    |    |    |    |    | x  |    |    | x  |    |    | 21 22 18 15 16                                             | 1                                                                                                                                                                                                                                                                                                                                                                                                                                                                                                                                                                            | 3 |
| <i>L. nivale</i>               | f   | eur                                                                                                                                | x |   |   |   |   |   | x | x |    |    |    |    |    | x  |    |    | x  |    |    | 29 25 17                                                   | 1                                                                                                                                                                                                                                                                                                                                                                                                                                                                                                                                                                            | 2 |
| <i>L. alpinum</i>              | m   | eur                                                                                                                                | x |   |   |   |   |   | x |   |    |    |    |    |    | x  |    |    | x  |    |    | 25 27 27 14 15                                             | 1                                                                                                                                                                                                                                                                                                                                                                                                                                                                                                                                                                            | 3 |
| <i>L. nivale</i>               | m   | eur                                                                                                                                | x |   |   |   |   |   |   | x |    |    |    |    |    | x  |    |    | x  |    |    | 24 28                                                      | 1                                                                                                                                                                                                                                                                                                                                                                                                                                                                                                                                                                            | 2 |
| <i>L. calocephalum</i>         | f   | him                                                                                                                                | x |   |   |   |   |   | x | x |    |    |    |    |    | x  | x  |    |    |    |    | 30 36 25 26 29                                             | 1                                                                                                                                                                                                                                                                                                                                                                                                                                                                                                                                                                            | 3 |
| <i>L. himalaynum</i>           | f   | him                                                                                                                                | x |   |   |   |   |   | x | x |    |    |    |    |    | x  |    |    | x  |    |    | 26 30 18                                                   | 1                                                                                                                                                                                                                                                                                                                                                                                                                                                                                                                                                                            | 3 |
| <i>L. leontopodioides</i>      | f   | him                                                                                                                                | x |   |   |   |   |   | x | x |    |    |    |    |    | x  |    |    | x  |    |    | 26                                                         | 1                                                                                                                                                                                                                                                                                                                                                                                                                                                                                                                                                                            | 4 |
| <i>L. leontopodinum</i>        | f   | him                                                                                                                                | x |   |   |   |   |   | x | x |    |    |    |    |    | x  |    |    | x  |    |    | 16 21 20 20 19 21                                          | 1                                                                                                                                                                                                                                                                                                                                                                                                                                                                                                                                                                            | 5 |
| <i>L. nanum</i>                | f   | him                                                                                                                                | x |   |   |   |   |   | x | x |    |    |    |    |    | x  |    |    | x  |    |    | 36 28 17                                                   | 1                                                                                                                                                                                                                                                                                                                                                                                                                                                                                                                                                                            | 3 |
| <i>L. ochroleucum</i>          | f   | him                                                                                                                                | x |   |   |   |   |   | x | x |    |    |    |    |    | x  |    |    | x  |    |    | 25 29 24 29 23 25 28 36 28                                 | 1                                                                                                                                                                                                                                                                                                                                                                                                                                                                                                                                                                            | 2 |
| <i>L. pusillum</i>             | f   | him                                                                                                                                | x |   |   |   |   |   | x | x |    |    |    |    |    | x  |    |    | x  |    |    | 24 33 25 24 23                                             | 1                                                                                                                                                                                                                                                                                                                                                                                                                                                                                                                                                                            | 2 |
| <i>L. souliei</i>              | f   | him                                                                                                                                | x |   |   |   |   |   | x | x |    |    |    |    |    | x  |    |    | x  |    |    | 23 23 20                                                   | 1                                                                                                                                                                                                                                                                                                                                                                                                                                                                                                                                                                            | 3 |
| <i>L. calocephalum</i>         | m   | him                                                                                                                                | x |   |   |   |   |   | x |   |    |    |    |    |    | x  |    |    | x  |    |    | 26 26 28 23 20                                             | 1                                                                                                                                                                                                                                                                                                                                                                                                                                                                                                                                                                            | 3 |
| <i>L. himalaynum</i>           | m   | him                                                                                                                                | x |   |   |   |   |   | x |   |    |    |    |    |    | x  |    |    | x  |    |    | 31                                                         | 1                                                                                                                                                                                                                                                                                                                                                                                                                                                                                                                                                                            | 3 |

Table 2. Continued

|                           |   |     |   |   |   |   |   |  |  |   |  |  |  |   |   |  |  |  |  |                         |   |    |
|---------------------------|---|-----|---|---|---|---|---|--|--|---|--|--|--|---|---|--|--|--|--|-------------------------|---|----|
| <i>L. leontopodioides</i> | m | him | x |   |   | x |   |  |  | x |  |  |  | x |   |  |  |  |  | 24 23 22                | 1 | 4  |
| <i>L. leontopodium</i>    | m | him | x |   |   | x |   |  |  | x |  |  |  | x |   |  |  |  |  | 21 18 20 28 22 18 23 24 | 1 | 5  |
| <i>L. nanum</i>           | m | him | x |   |   | x |   |  |  | x |  |  |  | x |   |  |  |  |  | 25 28 27                | 1 | 3  |
| <i>L. ochroleucum</i>     | m | him | x |   | x | x |   |  |  | x |  |  |  | x |   |  |  |  |  | 26 26 15 20 20 23       | 1 | 2  |
| <i>L. pusillum</i>        | m | him | x |   |   | x |   |  |  | x |  |  |  | x |   |  |  |  |  | 26 23 17 26             | 1 | 2  |
| <i>L. souliei</i>         | m | him | x |   |   | x |   |  |  | x |  |  |  | x |   |  |  |  |  | 35 34 30                | 1 | 3  |
| <i>L. andersonii</i>      | f | n   | x |   |   | x | x |  |  | x |  |  |  | x | x |  |  |  |  | 22 11                   | 3 | 8  |
| <i>L. artemisiifolium</i> | f | n   |   | x |   | x | x |  |  |   |  |  |  | x | x |  |  |  |  | 16 16                   | 2 | 9  |
| <i>L. dedekensii</i>      | f | n   |   | x |   | x | x |  |  |   |  |  |  | x |   |  |  |  |  | 22 20                   | 2 | 7  |
| <i>L. franchetii</i>      | f | n   |   | x |   | x | x |  |  |   |  |  |  | x | x |  |  |  |  | 13 14 18 18 18 13       | 2 | 10 |
| <i>L. haplophyloides</i>  | f | n   |   | x |   | x | x |  |  |   |  |  |  | x |   |  |  |  |  | 14 14 16 13 22 15       | 2 | 7  |
| <i>L. japonicum</i>       | f | n   |   | x |   | x | x |  |  |   |  |  |  | x |   |  |  |  |  | 21 19 19                | 2 | 9  |
| <i>L. sinense</i>         | f | n   |   | x |   | x | x |  |  |   |  |  |  | x | x |  |  |  |  | 13 17 15                | 3 | 8  |
| <i>L. spec. nov.</i>      | f | n   |   | x |   | x | x |  |  |   |  |  |  | x |   |  |  |  |  | 23 20                   | 3 | 11 |
| <i>L. stracheyi</i>       | f | n   |   | x |   | x | x |  |  |   |  |  |  | x | x |  |  |  |  | 20 20 19                | 2 | 7  |
| <i>L. andersonii</i>      | m | n   |   | x |   |   |   |  |  | x |  |  |  | x |   |  |  |  |  | 18 19                   | 3 | 8  |
| <i>L. artemisiifolium</i> | m | n   |   |   | x |   |   |  |  | x |  |  |  | x |   |  |  |  |  | 10 24 24                | 2 | 9  |
| <i>L. dedekensii</i>      | m | n   |   |   | x |   |   |  |  | x |  |  |  | x |   |  |  |  |  | 16 19                   | 2 | 7  |
| <i>L. franchetii</i>      | m | n   |   |   | x |   | x |  |  |   |  |  |  | x |   |  |  |  |  | 18/15 12                | 2 | 10 |
| <i>L. haplophyloides</i>  | m | n   |   |   | x |   |   |  |  | x |  |  |  | x |   |  |  |  |  | 18 20 24 17 20 19       | 2 | 7  |
| <i>L. japonicum</i>       | m | n   |   |   | x |   |   |  |  | x |  |  |  | x |   |  |  |  |  | 21 16 19                | 2 | 9  |
| <i>L. sinense</i>         | m | n   |   |   | x |   |   |  |  | x |  |  |  | x | x |  |  |  |  | 14                      | 3 | 8  |
| <i>L. spec. nov.</i>      | m | n   |   |   | x |   |   |  |  | x |  |  |  | x |   |  |  |  |  | 22                      | 3 | 11 |
| <i>L. stracheyi</i>       | m | n   |   |   | x |   |   |  |  | x |  |  |  | x |   |  |  |  |  | 15                      | 2 | 7  |

Different colors indicate that the infrageneric subgroups.

and intra-individual variation was detected. Only consistent counts, however, have been listed in Table 2.

The PCoA depicted a distinct cluster for *Leontopodium* section *Nobilia* (Handel-Mazzetti, 1927) if male and female fruit characteristics were evaluated separately. Characters 1, 4, 5, 7, 8, 10, 11, 12, 14, 18 and 21 (Table 2) for the male pappi were correlated and depict a clear cluster for section *Nobilia*. The first three coordinates accounted for 36.27, 21.25 and 19.13% of the morphological variation, respectively (Fig. 4).

The correlation of 13 female fruit characters (characters 1, 4, 7, 8, 9, 10, 11, 12, 13, 14, 18, 20 and 21; Table 2) also resulted in a distinct cluster of taxa belonging to section *Nobilia*. The first three principal coordinates accounted for 41.36, 24.59 and 18.23% of the morphological variation, respectively (Fig. 5). No other section could be detected by character correlation using the PCoA.

## DISCUSSION

### DIAGNOSTIC CHARACTERS FOR DELIMITATION OF SPECIES

Morphological data from the pappus have been shown to be taxonomically useful for assessing relationships among species within genera of Asteraceae, e.g. in *Solidago* L. (Semple & Hood, 2003). In the present study on *Leontopodium*, pappus characters have

also been revealed to be significant for inferring relationships. Several features are seen to be diagnostic for particular species and these observations provide new distinguishing characters.

The pappus tips of male flowers of *L. franchetii* possess a tip that is extremely clavate, with elongated and spread-out cells as in a fan (Fig. 1E). This structure has been found in all investigated specimens of this species from different geographical localities and it can be regarded as a new distinctive character.

*Leontopodium microphyllum* Hayata (male and female flowers) shows a unique kind of bristle tip, the structure of which can be seen as a newly discovered distinctive feature. The structure of the tips cannot be distinguished from the rest of the bristle: the tip is the same and it ends abruptly and bluntly (Fig. 1A).

The type of barbs found on the pappus bristle tips of *L. roseum* Hand.-Mazz. (male and female flowers) is characteristic for the species. These unique barbs (Fig. 1G) are button-like, and they provide a newly discovered diagnostic character.

*Leontopodium wilsonii* Beauverd and *L. villosum* Hand.-Mazz. are the only two species in which bristles in male flowers do not form unique tips, but instead are similar to the bristles of female flowers. Because the bristles of *L. wilsonii* are white and those of *L. villosum* are coloured, however, it is easy to distinguish the pappus between them.

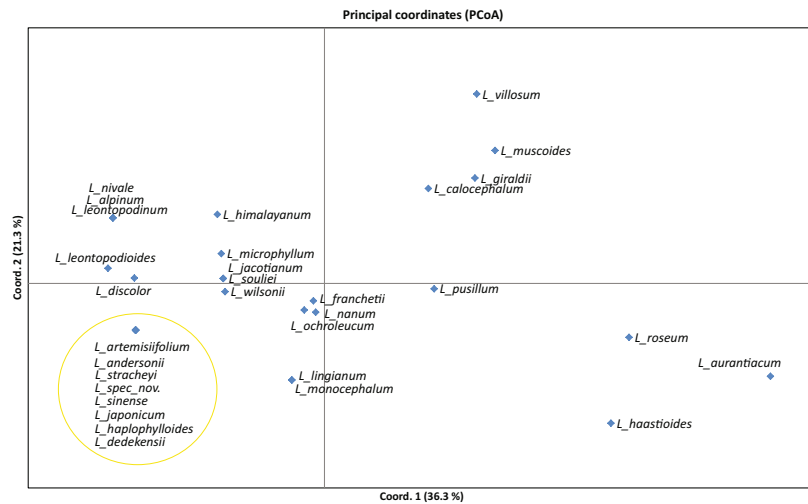

**Figure 4.** Principal coordinate analysis depicting morphological distances between the 31 analysed *Leontopodium* species by using 11 pappi characters (see Table 2) from the male pappi. The correlation depicts sectional delimitation (section *Nobilia*, marked in yellow) with the exception of *L. franchetii*.

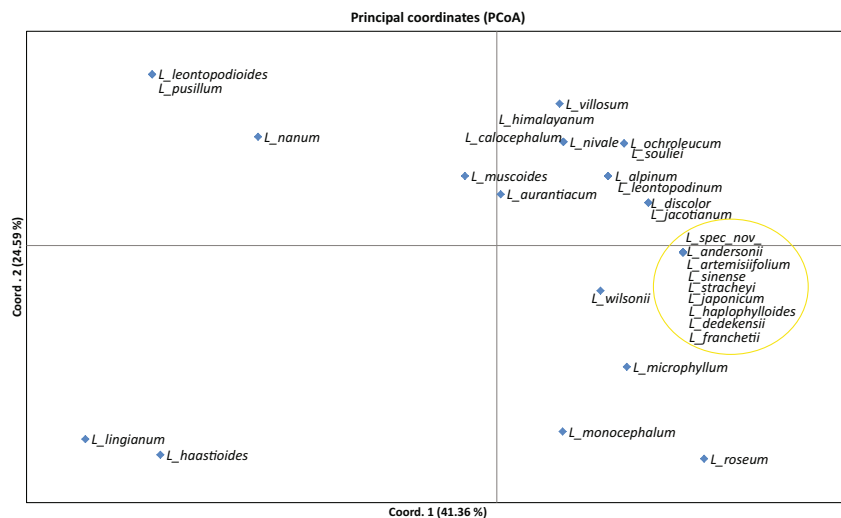

**Figure 5.** Principal coordinate analysis depicting morphological distances between the 31 analysed *Leontopodium* species by using 13 pappi characters (see Table 2) from the female pappi. The correlation depicts sectional delimitation (section *Nobilia*, marked in yellow).

#### RECOGNITION OF INFRAGENERIC SUBGROUPS

On different systematic levels, morphological data from the pappus in Asteraceae have helped in other taxa to reveal evolutionary relationships among and within genera. Mukherjee & Sarkarj (2001) showed the utility of pappus features among genera broadly in tribe Astereae and Semple (2006) likewise showed their efficacy in subtribe Chrysopsidinae of the same tribe. Semple & Hood (2005) also showed the positive

contributions of pappus structure for inferring affinities in *Symphotrichum* Nees and related genera of Astereae. This study in *Leontopodium* also provides evidence for the utility of pappus features for recognition of evolutionary subgroups in the genus.

Section *Nobilia* has been a previously accepted subgroup (Handel-Mazzetti, 1927), and it is confirmed by the results of this study. Female flowers in section *Nobilia* are characterized by pappus bristles that are never bald and never show a special

structure on their tip. The highest number of bristles can reach 23, but usually there are < 20. Some of the bristles are medium-long and thick, but frequently they are small and thick. The pappus bristles of male flowers in section *Nobilia* are completely uniform, except for three minimal deviations: they are normally thick, medium-long to short, have many large barbs on their surface and form tree-like tips. *Leontopodium franchetii*, however, is an exception because it forms a unique fan-like tip (Fig. 1E). The barbs of *L. sinense* Hemsl. are longer and thinner and those of *L. franchetii* fewer than those of the other members of section *Nobilia*. The maximum count of pappus bristles for male flowers in section *Nobilia* was 24, but < 20 is usually found. This uniform appearance of male and female pappus bristles separates section *Nobilia* from the rest of the genus.

Four *Leontopodium* spp. form soft, dense, ± hemispherical cushions [*L. lingianum* (Y.L.Chen) Dickoré, *L. aurantiacum* Hand.-Mazz., *L. haastioides* Hand.-Mazz., *L. muscoides* Hand.-Mazz.]. They are often seen as a subgroup, but proper evidence for their affiliation is still missing. The results of this study suggest that they are closely related to each other because they share particular characters. They have a large number of pappus bristles (always > 21) and almost no barbs on their more or less thick bristles. It is also remarkable that, with the exception of *L. lingianum* (Y.L.Chen) Dickoré, the male flowers do not form tree-like tips as the great majority of male flowers in the genus do.

Another subgroup comprises eight *Leontopodium* spp. that grow in the Himalayan range, the Tibetan Plateau and bordering regions. They differ with respect to the surface of the pappus bristles in number of barbs and kind of barbs, but they are conspicuously uniform in terms of length (nearly all long): the bristles of male flowers are medium or thick and form tree-like tips [with the exception of *L. calocephalum* (Franch.) Beauverd]; those of female flowers are medium or thin and end in elongated cells. The micromorphological uniformity of this group supports their coherence as a subgroup. The extraordinary tip of *L. calocephalum*, being not tree-like but instead with an accumulation of elongated cells, helps distinguish this species from the others of this group.

In Figure 6, pictures of pappi (one male and one female) show typical characters for each infrageneric subgroup.

#### PHYLOGENETIC RELATIONSHIPS

Safer *et al.* (2011) published the most elaborate molecular study on phylogenetic relationships in *Leontopodium*, but < 50% of the species of the genus

were included. Nevertheless, a comparison of the results shows that the data based on amplified fragment length polymorphisms and the micromorphological data of this study lead to congruent results regarding affinities. A neighbour-joining bootstrap consensus tree (50% majority rule) shows that the European species and the Mongolian/central Chinese species (groups A and B) are monophyletic [bootstrap support (BS) 100%]. For geographical reasons the European species were not included in the Himalayan group, but because of identical morphological pappus characters, it is possible to place them closely together. *Leontopodium leontopodioides* (Willd.) Beauverd and *L. leontopodium* (DC.) Hand.-Mazz. [= *L. campestre* (Ledebour) Hand.-Mazz.] form a separate group according to genetic data. These two species are also part of the same Himalayan group in this study (see above). The additional species of that morphological group were not investigated genetically. Section *Nobilia* is again delimited clearly by the molecular data.

Figure 6 shows the overlap of genetic analysis (Blösch *et al.*, 2010; Safer *et al.*, 2011) with morphological groups pointed out in this study.

#### DISPERSAL ECOLOGY

Our small, non-quantitative anemochory experiment showed that the pappus of *Leontopodium* can serve as a mechanism for wind dispersal. The pappus with attached fruits flew or slipped on the ground several metres from the blowing hair-dryer. The pappus always remained intact, suggesting that it seems functional for at least short-distance dispersal. More elaborate and quantified experiments might be done in the future.

Based on the results of this experimental and morphological study, conclusions concerning the dispersal biology of the species in the genus *Leontopodium* can be drawn. The distributional areas for all examined *Leontopodium* spp. were compiled and supplemented with relevant eco-factors. Areas were divided according to potential wind dispersal into three groups: (1) best conditions for wind dispersal; (2) wind dispersal might possibly be efficacious; and (3) wind dispersal not possible.

*Leontopodium* spp. that grow in regions where wind dispersal seems to have little prospect of success (Table 2), such as in forested regions of the subtropical zone, have short, thin and inconspicuous pappus bristles. If a plant is surrounded by plants that are as high as the plant or even higher, wind dispersal loses its efficiency (Sheldon & Burrows, 1973).

Species that are located in little or sparsely vegetated mountainous regions (Table 2) often possess a

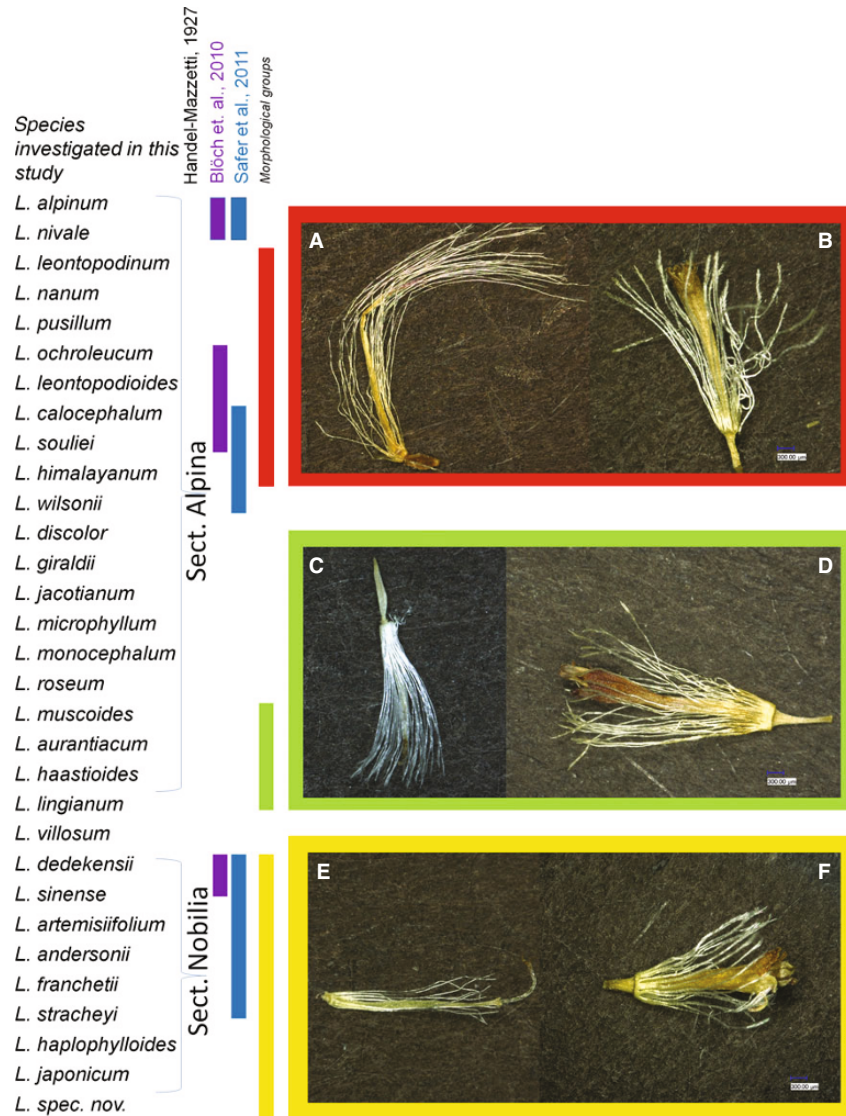

**Figure 6.** Species investigated in this study arranged according to the morphological groups established in 1927 (Handel-Mazzetti). The overlap with results of genetic analysis (Blösch *et al.*, 2010; Safer *et al.*, 2011) and with morphological groups pointed out in this study is marked. Pictures of two pappi (one male and one female) show typical characters for each of those groups. A, *L. pusillum* f. B, *L. ochroleucum* m. C, *L. haastioides* f. D, *L. aurantiacum* m. E, *L. andersonii* f. F, *L. haplophyloides* m. Scale bars are valid for A–F. m, male; f, female.

large number of long pappus bristles, especially on the female flowers, which are well suited for dispersal of the achenes. Minami & Azuma (2003) found in a theoretical–mathematical flight dynamics study that these features significantly increase the effectiveness of the pappus as a flight apparatus. Pappus with seeds are known to make parachuting flights which utilize the drag force acting on the pappus. With longer bristle hairs this force becomes stronger and the seeds are dispersed over a wider area. This might be an evolutionary advantage by helping colonization of larger geographical regions.

#### DEFENSIVE FUNCTION

The structure of male pappus bristles and especially their tips obviously cannot be interpreted in the context of dispersal biology, because these florets produce no fertile achenes. Nearly all pappus bristles of male flowers show a tree-like tip. One might hypothesize that these tips have a defensive function to protect the infertile ovaries and/or adjacent fertile ovaries in commonly heterogamous inflorescences from predators and water (Stuessy & Spooner, 1988; Stuessy & Garver, 1996).

## PAPPUS STRUCTURE AND POLYPLOIDY

In some genera of Asteraceae a correlation between pappus length and polyploidy has been documented and Semple (2006) showed such a relationship in subtribe Chrysopsidinae (tribe Astereae). Such a correlation, however, does not apply for *Leontopodium*. The pappus of section *Nobilia*, for example, is remarkably uniform even though different chromosome numbers and even ploidy levels exist in the group (Russell *et al.*, 2013; Stille *et al.*, 2014).

## ACKNOWLEDGEMENTS

We thank Jochen Heinrichs (Georg-August-Universität Göttingen, Herbarium), Georg Miehe (Philipps-Universität Marburg), Walter Till (University of Vienna, Herbarium) and Ernst Vitek (Natural History Museum Vienna) for providing plant material and for their overall generous support.

## REFERENCES

- Azuma A. 2006.** *The biokinetics of flying and swimming, 2nd edn.* New York: Springer.
- Beauverd G. 1909.** Nouvelles espèces euroasiatiques du genre *Leontopodium*. *Bulletin de la Société Botanique de Genève* **1**: 185–196.
- Beauverd G. 1910.** Contribution à l'étude des Composées. Suite IV. *Bulletin de la Société Botanique de Genève* **2**: 244–252.
- Beauverd G. 1911.** Contribution à l'étude des Composées. Suite V. *Bulletin de la Société Botanique de Genève* **3**: 353–359.
- Beauverd G. 1912.** Contribution à l'étude des Composées. Suite VI: Nouveaux *Leontopodium* et *Raoulia*. *Bulletin de la Société Botanique de Genève* **5**: 12–55.
- Beauverd G. 1914.** Contribution à l'étude des Composées. Suite IX. *Bulletin de la Société Botanique de Genève* **6**: 142–148.
- Blösch C, Dickoré WB, Samuel R, Stuessy T. 2010.** Molecular phylogeny of the edelweiss (*Leontopodium*, Asteraceae – Gnaphalieae). *Edinburgh Journal of Botany* **67**: 235–264.
- Dobner MJ, Ellmerer EP, Schwaiger S, Batsugkh O, Narantuya S, Stutz M, Stuppner H. 2003a.** New lignan, benzofuran, and sesquiterpene derivatives from the roots of *Leontopodium alpinum* and *L. leontopodioides*. *Helvetica Chimica Acta* **86**: 733–738.
- Dobner MJ, Schwaiger S, Jenewein IH, Stuppner H. 2003b.** Antibacterial activity of *Leontopodium alpinum* (edelweiss). *Journal of Ethnopharmacology* **89**: 301–303.
- Dobner MJ, Sosa S, Schwaiger S, Altinier G, Loggia RD, Kaneider NC, Stuppner H. 2004.** Anti-inflammatory activity of *Leontopodium alpinum* and its constituents. *Planta Med* **70**: 502–508.
- Erhardt A. 1993.** Pollination of the edelweiss, *Leontopodium alpinum*. *Botanical Journal of the Linnean Society* **111**: 229–240.
- Handel-Mazzetti H. 1927.** Systematische Monographie der Gattung *Leontopodium*. *Beihefte zum Botanischen Centralblatt* **44**: 1–178.
- Hook I. 1994.** Secondary metabolites in hairy root cultures of *Leontopodium alpinum* Cass. (edelweiss). *Plant Cell Tissue and Organ Culture* **38**: 321–326.
- Hornick A, Schwaiger S, Rollinger JM, Vo NP, Prast H, Stuppner H. 2008.** Extracts and constituents of *Leontopodium alpinum* enhance cholinergic transmission: brain ACh increasing and memory improving properties. *Biochemical Pharmacology* **76**: 236–248.
- Maugini E. 1962.** Morfologia florale, embriologia ed embriogenesi in *Leontopodium alpinum* Cass. var. *typicum* Fiori e Paoletti. *Giornale Botanico Italiano* **96**: 1–18.
- Meusel H, Jaeger EJ. 1992.** *Vergleichende Chorologie der zentraleuropäischen Flora*. Jena: Fischer Verlag.
- Minamia S, Azuma A. 2003.** Various flying modes of wind-dispersal seeds. *Journal of Theoretical Biology* **225**: 1–14.
- Mukherjee SK, Sarkarj AK. 2001.** Morphology and structure of cypselas in thirteen species of the tribe Astereae (Asteraceae). *Phytomorphology* **51**: 17–26.
- Peakall R, Smouse PE. 2012.** GenAlEx 6.5: genetic analysis in Excel. Population genetic software for teaching and research – an update. *Bioinformatics* **28**: 2537–2539.
- Reisinger U, Schwaiger S, Zeller I, Messner B, Stigler R, Wiedemann D, Mayr T, Seger C, Schachner T, Dirsch VM, Vollmar AM, Bonatti JO, Stuppner H, Laufer G, Bernhard D. 2009.** Leolignin, the major lignan from edelweiss, inhibits intimal hyperplasia of venous bypass grafts. *Cardiovascular Research* **82**: 542–549.
- Russell A, Safer S, Weiss-Schneeweiss H, Temsch E, Stuppner H, Stuessy TF, Samuel R. 2013.** Chromosome counts and genome size of *Leontopodium* species (Asteraceae: Gnaphalieae) from south-western China. *Botanical Journal of the Linnean Society* **171**: 627–636.
- Safer S, Tremetsberger K, Guo Y-P, Kohl G, Samuel MR, Stuessy TF, Stuppner H. 2011.** Phylogenetic relationships in the genus *Leontopodium* (Asteraceae: Gnaphalieae) based on AFLP data. *Botanical Journal of the Linnean Society* **165**: 364–377.
- Schwaiger S, Adams M, Seger C, Ellmerer EP, Bauer R, Stuppner H. 2004.** New constituents of *Leontopodium alpinum* and their *in vitro* leukotriene biosynthesis inhibitory activity. *Planta Medica* **70**: 978–985.
- Schwaiger S, Cervellati R, Seger C, Ellmerer EP, About N, Renimel I, Godenir C, Andre P, Gafner F, Stuppner H. 2005.** Leontopodic acid – a novel highly substituted glucaric acid derivative from edelweiss (*Leontopodium alpinum* Cass.) and its antioxidative and DNA protecting properties. *Tetrahedron* **61**: 4621–4630.
- Semple JC. 2006.** Quadruple, triple, double, and simple pappi in the goldenasters, subtribe Chrysopsidinae (Asteraceae: Astereae). *Sida* **22**: 503–531.



- Semple JC, Hood JLA. 2003.** Pappus variation in *Solidago* (Asteraceae: Astereae). *Sida* **20**: 1617–1630.
- Semple JC, Hood JLA. 2005.** Pappus variation in North American Asters. I. Double, triple and quadruple pappus in *Symphotrichum* and related aster genera (Asteraceae: Astereae). *Sida* **21**: 2141–2159.
- Sheldon JC, Burrows FM. 1973.** The dispersal effectiveness of the achene–pappus units of selected Compositae in steady winds with convection. *New Phytologist* **72**: 665–675.
- Sokolowska-Kulczycka A. 1959.** Apomiksja u *Leontopodium alpinum* Cass. [Apomixis in *Leontopodium alpinum* Cass.]. *Acta Biologica Cracoviensia Series Botanica* **2**: 51–63.
- Speroni E, Schwaiger S, Egger P, Berger AT, Cervellati R, Govoni P, Guerra MC, Stuppner H. 2006.** *In vivo* efficacy of different extracts of edelweiss (*Leontopodium alpinum* Cass.) in animal models. *Journal of Ethnopharmacology* **105**: 421–426.
- Stille JS, Jaeger M, Dickoré WB, Ehlers K, Holzhauer SIJ, Mayland-Quellhorst E, Safer S, Schwaiger S, Stuessy TF, Stuppner H, Wissemann V. 2014.** Chromosome numbers of the edelweiss, *Leontopodium* (Asteraceae, Compositae – Gnaphalieae). *Edinburgh Journal of Botany* **71**: 23–33.
- Stuessy TF, Garver D. 1996.** The defensive role of pappus in heads of Compositae. In: Caligari PDS, Hind DJN, eds. *Compositae: biology and utilization. Proceedings of the International Compositae Conference, Kew, 1994*. Kew: Royal Botanic Gardens, 81–91.
- Stuessy TF, Spooner DM. 1988.** The adaptive and phylogenetic significance of receptacular bracts in the Compositae. *Taxon* **37**: 114–126.
- Stuppner H, Ellmerer EP, Ongania KH, Dobner M. 2002.** Bisabolane derivatives from *Leontopodium alpinum*. *Helvetica Chimica Acta* **85**: 2982–2989.
- Tira S, Galeffi C, Dimodica G. 1970.** Flavonoids of Gnaphalieae – *Leontopodium alpinum* Cass. *Experientia* **26**: 1192.
- Van der Pijl L. 1982.** *Principles of dispersal in higher plants*. New York: Springer .
- Wu ZY, Raven PH, Hong DY. 1994.** *Flora of China*. Beijing/St Louis: Science Press/Missouri Botanical Garden Press.
